# Supplementary material for: Complaint-Directed Mini-Interventions for Depressive Complaints: A Randomized Controlled Trial of Unguided Web-Based Self-Help Interventions
Source: PubMed Central journal article supplement (PMC5244033; doi:10.2196/jmir.6581), 2017-01-04
Supplement: jmir_v19i1e4_app3.pdf [file jmir_v19i1e4_app3.pdf]

|                           | 0 logins <sup>a</sup><br>(n=49) | 1-3 logins<br>(N=57) | 4 or more<br>logins<br>(N=59) | Test Time*login group         |             |
|---------------------------|---------------------------------|----------------------|-------------------------------|-------------------------------|-------------|
|                           | EMM (SEM) <sup>b</sup>          | EMM (SEM)            | EMM (SEM)                     | F <sub>dfi</sub>              | p-value     |
| <b>Depression (IDS)</b>   |                                 |                      |                               | <b>1.45</b> <sub>4, 220</sub> | <b>0.22</b> |
| Baseline                  | 25.51 (1.19)                    | 25.71 (1.13)         | 26.89 (1.07)                  |                               |             |
| 3 months                  | 22.96 (1.68)                    | 19.79 (1.41)         | 19.72 (1.23)                  |                               |             |
| 6 months                  | 19.33 (1.98)                    | 20.95 (1.65)         | 20.09 (1.41)                  |                               |             |
| <b>Sleep (JSEQ)</b>       |                                 |                      |                               | <b>0.27</b> <sub>4, 188</sub> | <b>0.90</b> |
| Baseline                  | 11.96 (0.76)                    | 11.27 (0.72)         | 11.62 (0.68)                  |                               |             |
| 3-months                  | 10.11 (1.03)                    | 8.16 (0.88)          | 9.18 (0.77)                   |                               |             |
| 6 months                  | 8.71 (1.19)                     | 7.63 (1.00)          | 7.90 (0.87)                   |                               |             |
| <b>Stress (PSS)</b>       |                                 |                      |                               | <b>0.83</b> <sub>4, 198</sub> | <b>0.51</b> |
| Baseline                  | 20.98 (0.88)                    | 21.89 (0.83)         | 22.43 (0.79)                  |                               |             |
| 3-months                  | 17.31 (1.25)                    | 17.68 (1.03)         | 18.41 (0.90)                  |                               |             |
| 6 months                  | 17.77 (1.44)                    | 16.91 (1.20)         | 16.13 (1.03)                  |                               |             |
| <b>Worry (PSWQ)</b>       |                                 |                      |                               | <b>2.23</b> <sub>2,184</sub>  | <b>0.07</b> |
| Baseline                  | 35.33 (1.36)                    | 39.51 (1.28)         | 38.13 (1.22)                  |                               |             |
| 3-months                  | 31.84 (1.75)                    | 32.16 (1.48)         | 32.84 (1.33)                  |                               |             |
| 6 months                  | 31.05 (1.94)                    | 36.06 (1.66)         | 31.73 (1.47)                  |                               |             |
| <b>Anxiety (GAD-7)</b>    |                                 |                      |                               | <b>1.11</b> <sub>4,193</sub>  | <b>0.40</b> |
| Baseline                  | 9.41 (0.59)                     | 11.02 (0.56)         | 9.80 (0.53)                   |                               |             |
| 3 months                  | 7.20 (0.84)                     | 6.87 (0.70)          | 6.21 (0.61)                   |                               |             |
| 6 months                  | 7.37 (0.99)                     | 6.76 (0.82)          | 6.54 (0.70)                   |                               |             |
| <b>Wellbeing (WEMWBS)</b> |                                 |                      |                               | <b>0.58</b> <sub>4, 214</sub> | <b>0.68</b> |
| Baseline                  | 43.14 (0.97)                    | 43.20 (0.92)         | 42.69 (0.87)                  |                               |             |
| 3-months                  | 46.00 (1.39)                    | 47.21 (1.16)         | 46.25 (1.01)                  |                               |             |
| 6 months                  | 47.70 (1.64)                    | 46.20 (1.37)         | 47.89 (1.15)                  |                               |             |
